# Supplementary material
Source: PubMed Central journal article supplement (PMC6050933)
Supplement: ASN.2017101055SupplementaryData1.pdf [file ASN.2017101055SupplementaryData1.pdf]

**Supplementary Table 1. Countries Grouped by World Region**

| <b>World Region</b>           | <b>Countries</b>                                                                                                                                                                                                                                                                                                                                                                                                                                                                                                                                                                                                                                         |
|-------------------------------|----------------------------------------------------------------------------------------------------------------------------------------------------------------------------------------------------------------------------------------------------------------------------------------------------------------------------------------------------------------------------------------------------------------------------------------------------------------------------------------------------------------------------------------------------------------------------------------------------------------------------------------------------------|
| East Asia & Pacific           | Asia NES, Brunei, Cambodia, People's Republic of China, Cook Islands, Fiji, French Polynesia, Guam, Hong Kong, Republic of Indonesia, Japan, People's, Democratic Republic of Korea, Republic of Korea, Macao, Macau Sar, Malaysia, Laos, People's Republic of Mongolia, Myanmar (Burma), Nauru, Papua New Guinea, Philippines, New Caledonia, American Samoa, Western Samoa, Singapore, Solomon Islands, Taiwan, Thailand, Tibet, Tonga, Vanuatu, Socialist Republic of Vietnam, The Solomons, Tuvalu, Kiribati, Republic of Palau                                                                                                                      |
| Eastern Europe & Central Asia | Albania, Armenia, Azerbaijan, Belarus, Bosnia-Herzegovina, Bulgaria, Croatia, Cyprus, Czech Republic, Estonia, French Guiana, Georgia, Kazakhstan, Latvia, Lithuania, Republic of Montenegro, Poland, Moldova, Romania, Russia, Serbia and Montenegro, Republic of Serbia, Slovak Republic, Slovenia, Tadjikistan, Turkey, Turkmenistan, Ukraine, Uzbekistan, FYR Macedonia, Republic of Kosovo, Kyrgyzstan                                                                                                                                                                                                                                              |
| Latin America & Caribbean     | Anguilla, Antigua and Barbuda, Argentina, Aruba, The Bahama Islands, Barbados, Belize, Bermuda, Bolivia, Brazil, Cayman Islands, Chile, Colombia, Costa Rica, Cuba, Dominica, Dominican Republic, Ecuador, El Salvador, Grenada, Guadeloupe, Guatemala, Guyana, Haiti, Honduras, Jamaica, Martinique, Mexico, Montserrat, The Netherlands Antilles, Nicaragua, Panama Canal Zone, Republic of Panama, Paraguay, Peru, Puerto Rico, St. Kitts-Nevis, St. Lucia, St. Vincent and the Grenadines, Surinam, Republic of Trinidad & Tobago, Turks and Caicos Islands, Uruguay, Venezuela, British Virgin Islands, U.S Virgin Islands, Nevis, Falkland Islands |
| Middle East & North Africa    | Algeria, Bahrain, Bhutan, Egypt, Iran, Iraq, Israel, Jordan, Kuwait, Lebanon, Libya, Morocco, Oman, Qatar, Saudi Arabia, Tunisia, United Arab Emirates, Western Sahara, People's Democratic Republic of Yemen, Republic of Yemen, Syria, Palestinian Authority (Gaza/West Bank)                                                                                                                                                                                                                                                                                                                                                                          |
| South Asia                    | Afghanistan, Bangladesh, India, Republic of Maldives, Nepal, Pakistan, Sri Lanka, Sikkim                                                                                                                                                                                                                                                                                                                                                                                                                                                                                                                                                                 |

|                                              |                                                                                                                                                                                                                                                                                                                                                                                                                                                                                                                                                                                                                                                                                                                                                                                                           |
|----------------------------------------------|-----------------------------------------------------------------------------------------------------------------------------------------------------------------------------------------------------------------------------------------------------------------------------------------------------------------------------------------------------------------------------------------------------------------------------------------------------------------------------------------------------------------------------------------------------------------------------------------------------------------------------------------------------------------------------------------------------------------------------------------------------------------------------------------------------------|
| Western Europe, USA, Australia & New Zealand | Andorra, Austria, Azores, Belgium, Denmark, Finland, France, Democratic Republic of Germany, Federal Republic of Germany, Gibraltar, Greece, Greenland, Hungary, Iceland, Republic of Ireland, Italy, Liechtenstein, Luxembourg, Madeira, Malta, Monaco, The Netherlands, Norway, Spain, Sweden, Switzerland, United Kingdom and Colonies, Portugal, San Marino, Czechoslovakia, Union of Soviet Socialist Republics, Yugoslavia, Canary Islands, Holy See, Australia, New Zealand, United States of America                                                                                                                                                                                                                                                                                              |
| Sub-Saharan Africa                           | Angola, Peoples Republic of Benin, Republic of Botswana, Burkina-Faso, Burundi, Federal Republic of Cameroon, Cape Verde Islands, Central Africa Republic, Republic of Chad, Comoros, Democratic Republic of Congo, People's Republic of the Congo, Eritrea, Ethiopia, Gabon Republic, Gambia, Equatorial Guinea, Republic of Guinea, Guinea-Bissau, Ghana, Kenya, Lesotho, Liberia, Madagascar, Malawi, Republic of Mali, Mauritania, Mauritius, Mozambique, Namibia, Republic of the Niger, Nigeria, Reunion, Rwanda, Sao Tome E Principe, Senegal, Seychelles, Sierra Leone, Democratic Republic of Somalia, Republic of South Africa, Democratic Republic of Sudan, Swaziland, United Republic of Tanzania, Republic of Togo, Uganda, Zambia, Zimbabwe, Republic of Djibouti, Republic of Ivory Coast |
| Other                                        | Africa NES, Canada, Commonwealth of the Northern Mariana Island, Country not stated, Europe NES, Pitcairn Island, St. Helena, Ocean NES                                                                                                                                                                                                                                                                                                                                                                                                                                                                                                                                                                                                                                                                   |

**Supplementary Table 2.** Canadian Organ Replacement Register Codes for Maintenance (chronic) Dialysis

| <b>Modality</b> | <b>Treatment Code</b>                                                                                   |
|-----------------|---------------------------------------------------------------------------------------------------------|
| Conventional HD | 111, 112, 113, 121, 122, 123, 131, 132, 133, 211, 221, 231, 311, 312, 313, 321, 322, 323, 331, 332, 333 |
| Home HD         | 413, 423, 433                                                                                           |
| PD              | 141, 151, 152, 241, 242, 251, 252, 443, 453                                                             |
| Other           | 060                                                                                                     |

Abbreviations: HD, hemodialysis; PD, peritoneal dialysis.

**Supplementary Figure 1. Additional analysis restricted to those with end-stage kidney disease requiring maintenance dialysis, showing the proportion by immigrant country of birth, stratified by females (A) and males (B)**

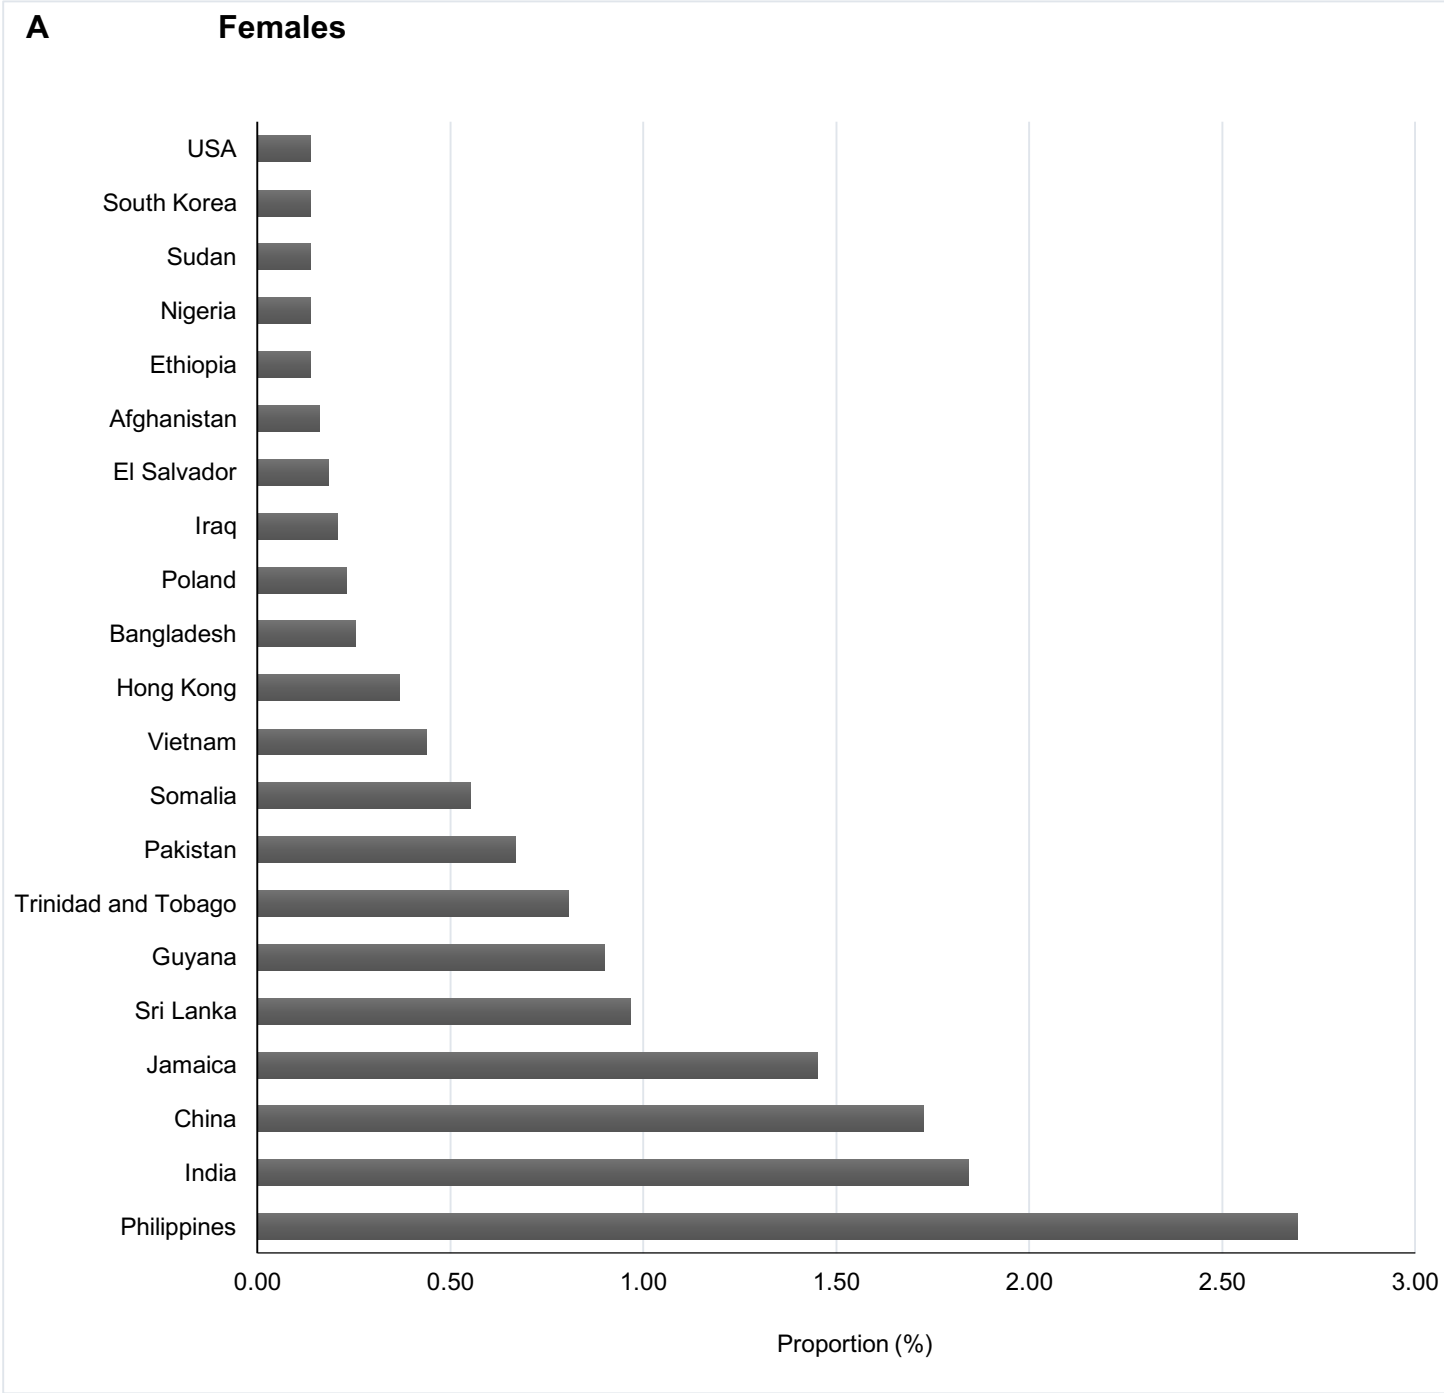

**B**      **Males**

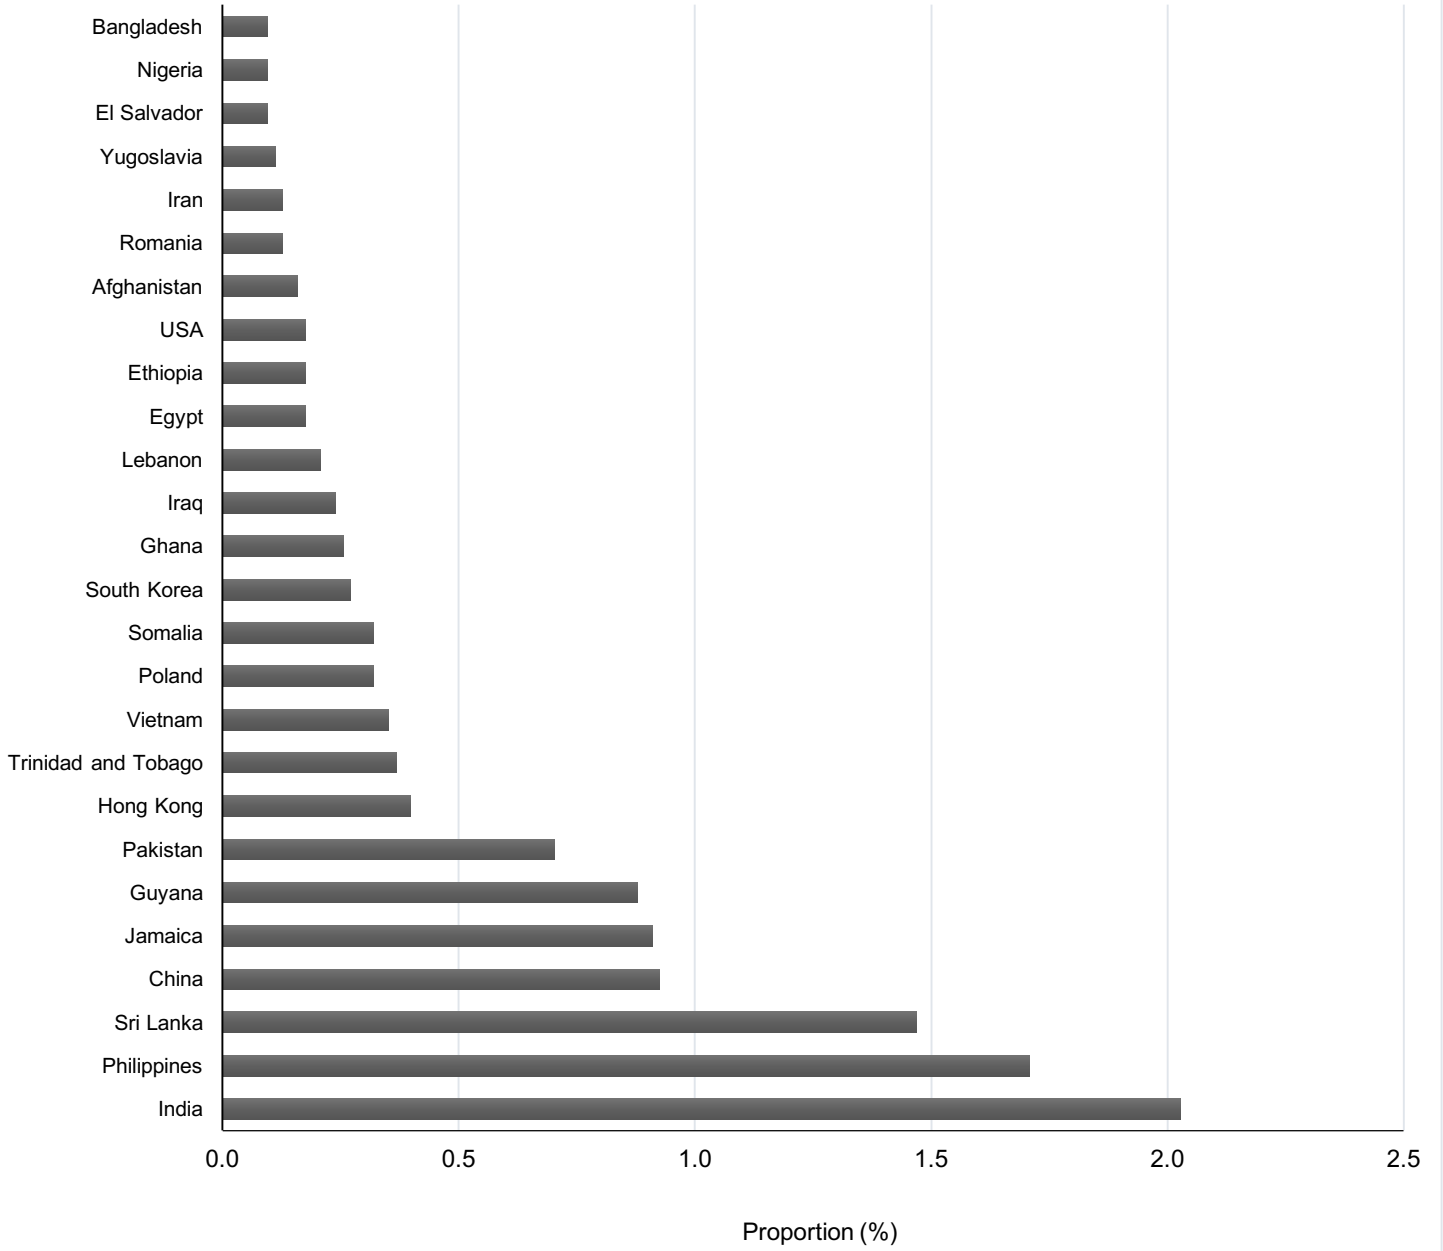

**Supplementary Figure 2. Additional analysis restricted to those with end-stage kidney disease requiring maintenance dialysis, showing the proportion by immigrant country of birth, stratified by those with (A) and without (B) diabetes mellitus.**

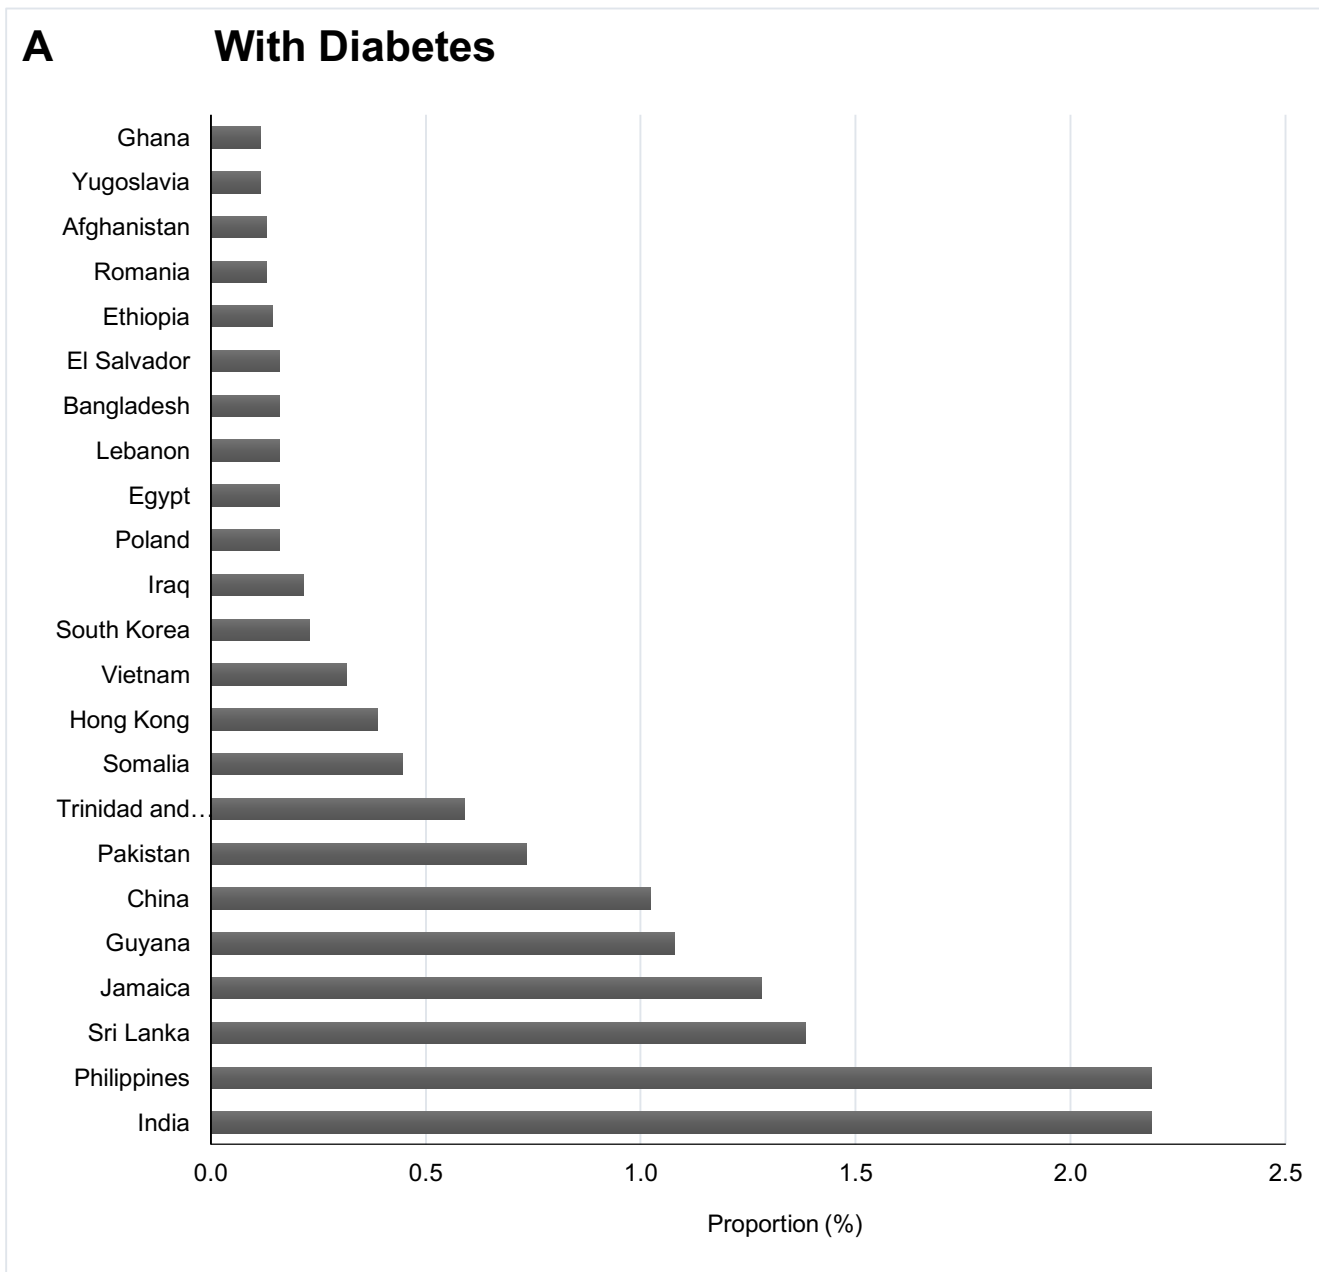

# B No Diabetes

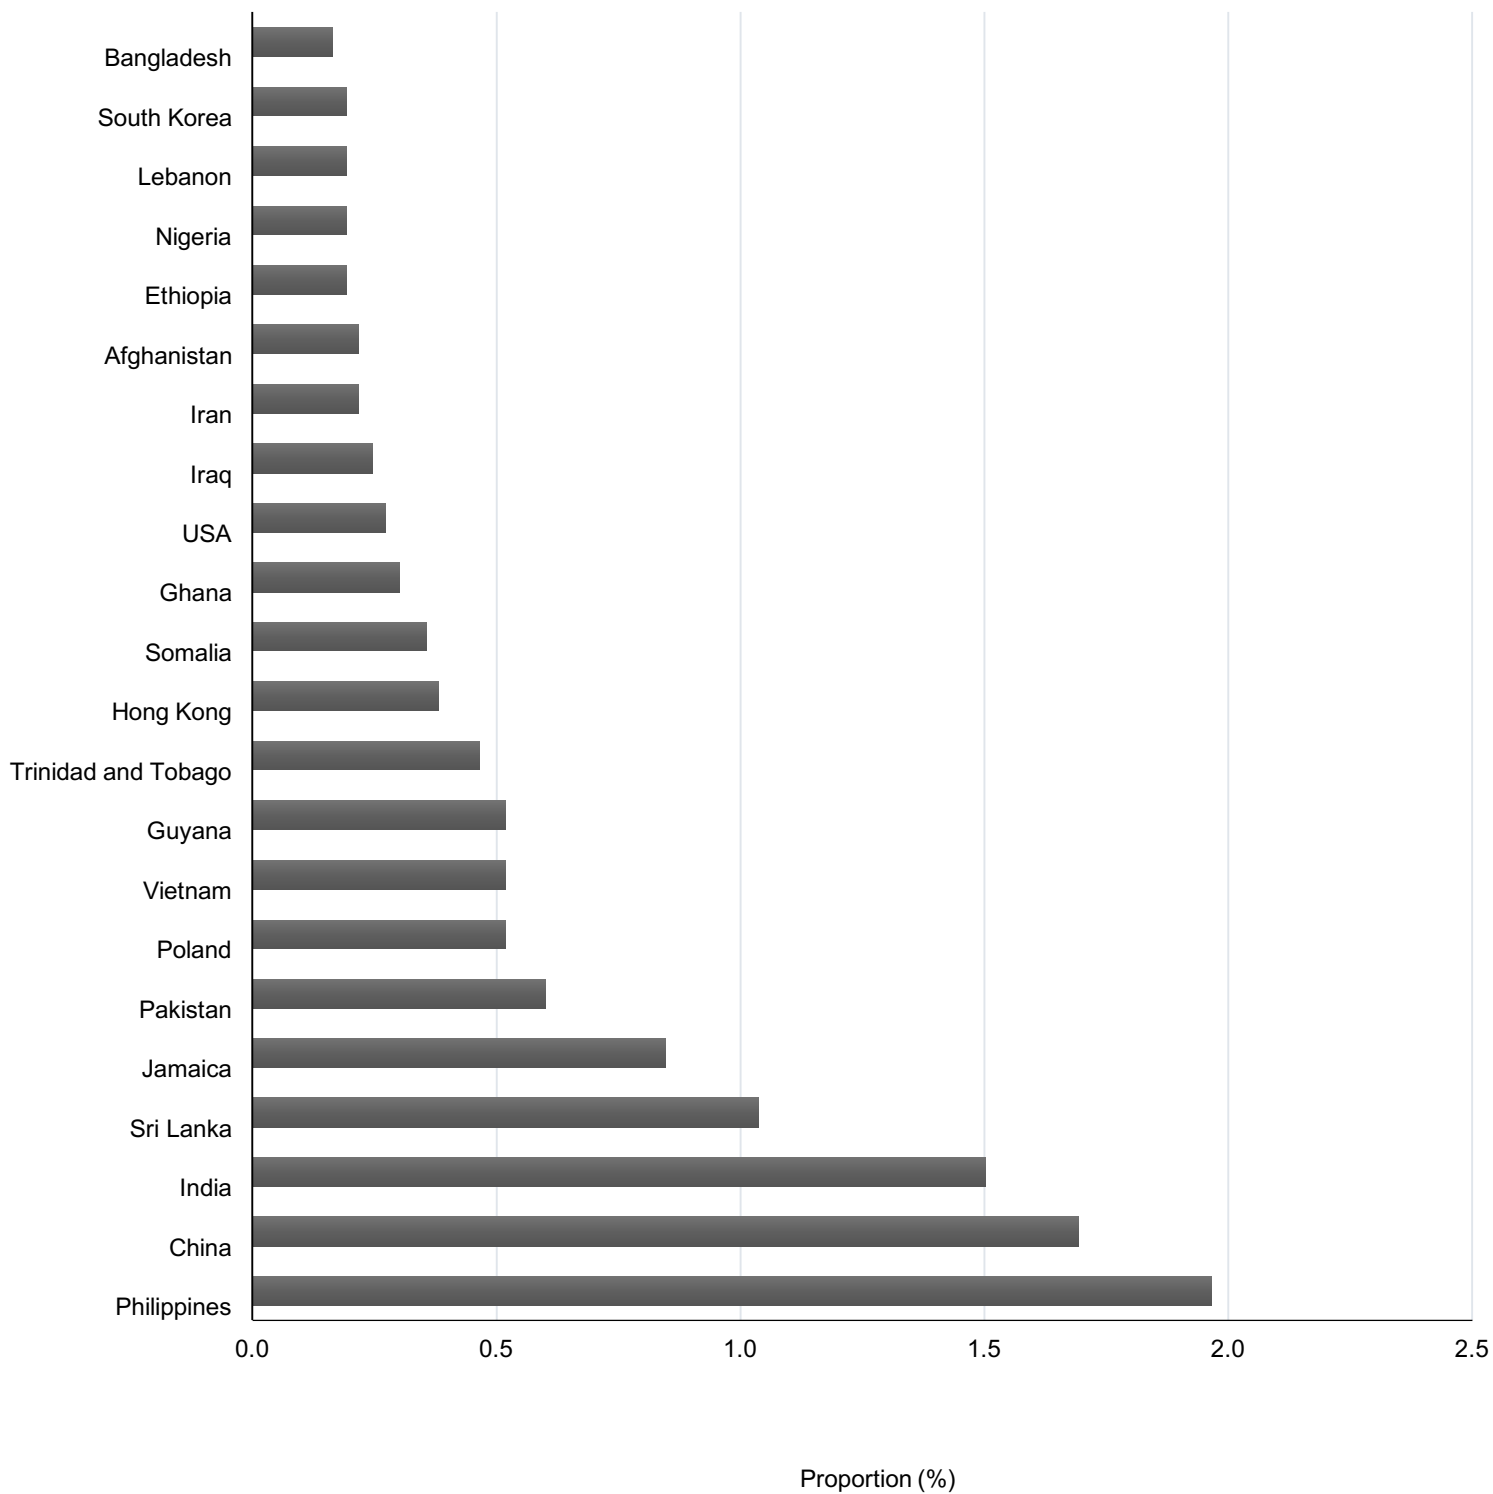

**Supplementary Figure 3. Additional analysis restricted to those with end-stage kidney disease requiring maintenance dialysis, showing the proportion by immigrant country of birth, stratified by dialysis modality: conventional hemodialysis (HD) (A) and peritoneal dialysis (PD)/home hemodialysis (HD) (B)**

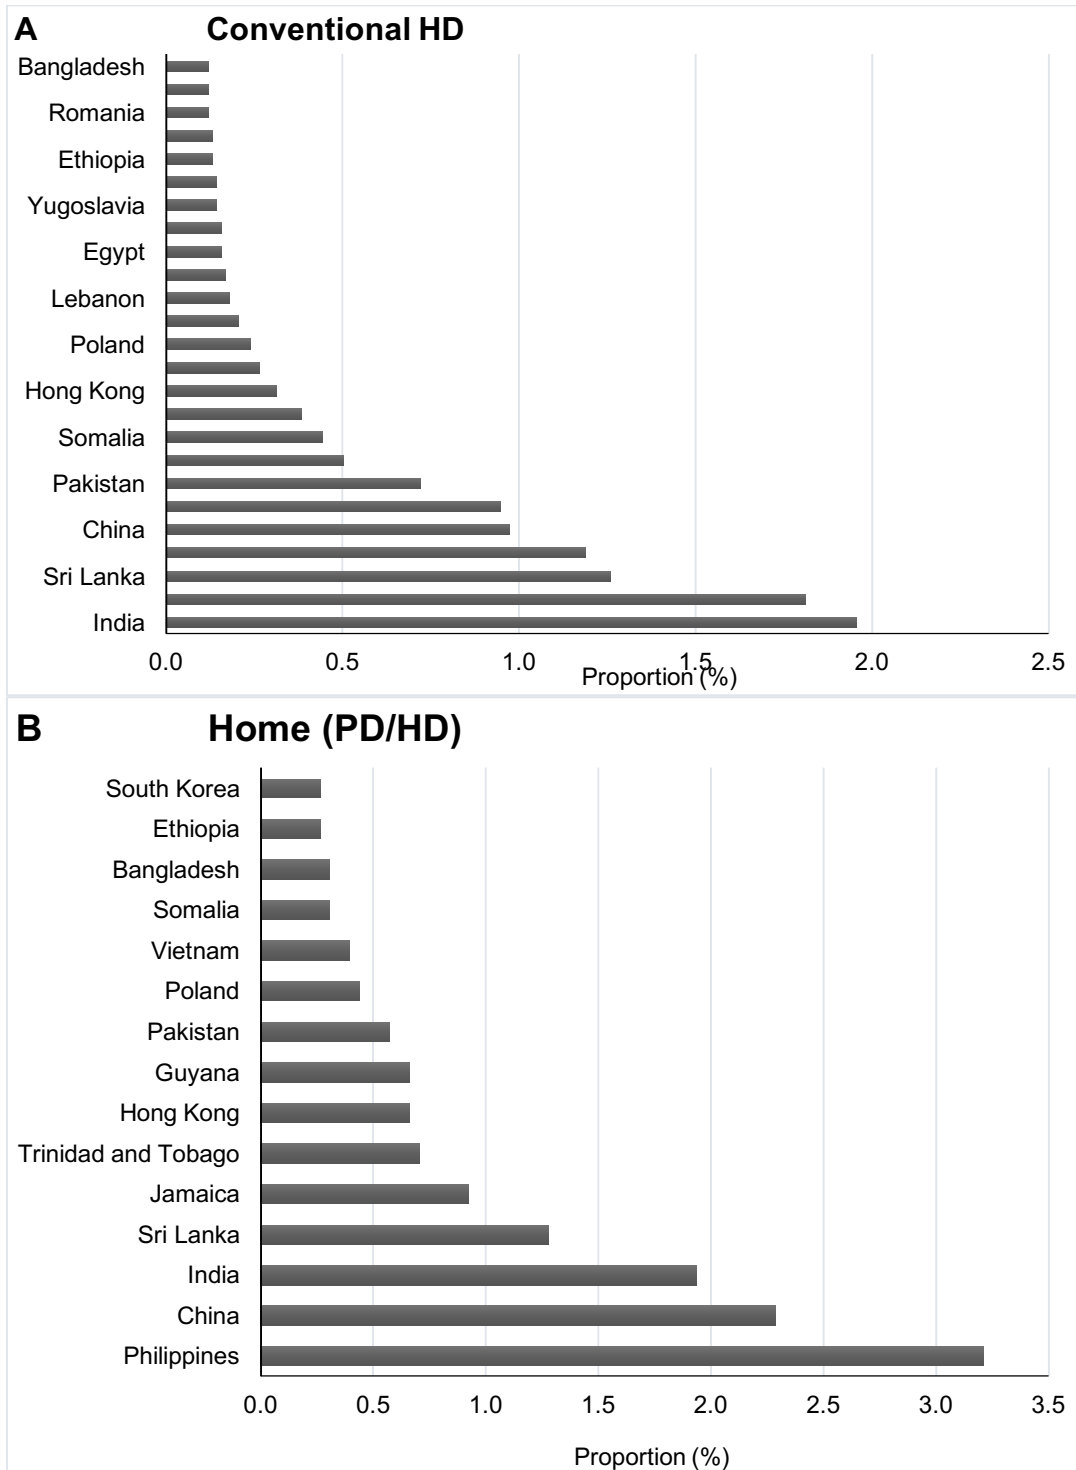



**Supplementary Figure 4. Age-adjusted prevalence ratios of end-stage kidney disease requiring maintenance dialysis, by country of birth, stratified by those with (A) and without**

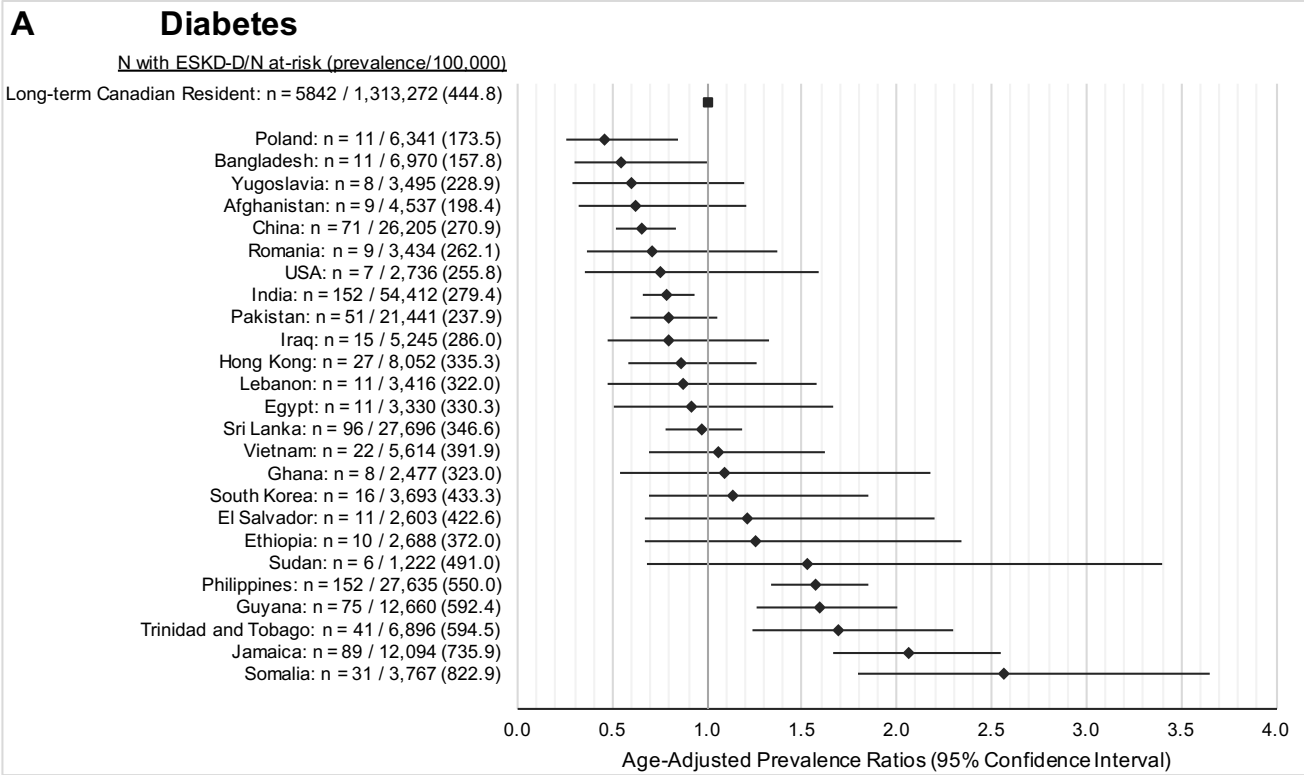

## B No Diabetes

N with ESKD-D/N at-risk (prevalence/100,000)

Long-term Canadian Resident: n = 3,067 / 7,547,011 (40.6)

Iran: n = 8 / 52,479 (15.2)  
 Hong Kong: n = 14 / 42,543 (32.9)  
 South Korea: n = 7 / 25,814 (27.1)  
 Poland: n = 19 / 53,721 (35.4)  
 China: n = 62 / 166,835 (37.2)  
 India: n = 55 / 177,933 (30.9)  
 USA: n = 10 / 28,326 (35.3)  
 Iraq: n = 9 / 26,326 (34.2)  
 Pakistan: n = 22 / 74,631 (29.5)  
 Lebanon: n = 7 / 15,579 (44.9)  
 Bangladesh: n = 6 / 18,197 (33.0)  
 Afghanistan: n = 8 / 20,572 (38.9)  
 Guyana: n = 19 / 30,440 (62.4)  
 Vietnam: n = 19 / 27,409 (69.3)  
 Philippines: n = 72 / 115,922 (62.1)  
 Jamaica: n = 31 / 50,683 (61.2)  
 Sri Lanka: n = 38 / 57,948 (65.6)  
 Ethiopia: n = 7 / 11,669 (60.0)  
 Trinidad and Tobago: n = 17 / 20,790 (81.8)  
 Nigeria: n = 7 / 11,751 (59.6)  
 Somalia: n = 13 / 13,235 (98.2)  
 Ghana: n = 11 / 10,781 (102.0)

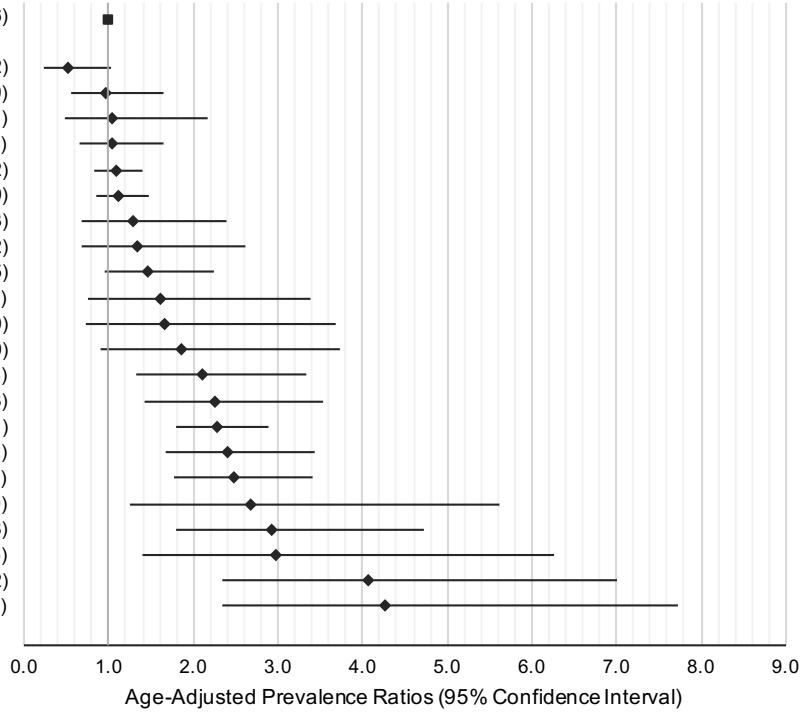

Long-term Canadian residents are the referent. Only countries with 6 or more patients with end-stage kidney disease requiring maintenance dialysis were reported for ICES privacy reasons.

Abbreviations: ESKD-D – end stage kidney disease receiving maintenance hemodialysis, USA-United States of America.

**Supplementary Table 3.** Characteristics of immigrants and long-term residents. All data are presented as (%) unless otherwise stated.

|                                              | <b>Immigrant</b> | <b>Long-term resident</b> | <b>Standardized Difference (%)</b> |
|----------------------------------------------|------------------|---------------------------|------------------------------------|
| Total N                                      | <b>1,902,394</b> | <b>8,860,283</b>          |                                    |
| <b>Demographics</b>                          |                  |                           |                                    |
| Age, years (mean, SD)                        | 44 (±15)         | 48 (±19)                  | 23                                 |
| 18-29                                        | 340,271 (17.9)   | 1,807,000 (20.4)          | 6                                  |
| 30-39                                        | 424,286 (22.3)   | 1,352,135 (15.3)          | 18                                 |
| 40-49                                        | 473,535 (24.9)   | 1,452,011 (16.4)          | 21                                 |
| 50-59                                        | 368,244 (19.4)   | 1,645,862 (18.6)          | 2                                  |
| 60-69                                        | 169,178 (8.9)    | 1,306,004 (14.7)          | 18                                 |
| 70-79                                        | 84,927 (4.5)     | 778,893 (8.8)             | 17                                 |
| 80-89                                        | 36,507 (1.9)     | 423,632 (4.8)             | 16                                 |
| ≥ 90                                         | 5,446 (0.3)      | 94,746 (1.1)              | 10                                 |
| Female                                       | 1,002,369 (52.7) | 4,588,899 (51.8)          | 2                                  |
| Income quintile                              | 5,019 (0.3)      | 39,102 (0.4)              | 2                                  |
| 1 (lowest)                                   | 474,174 (24.9)   | 1,547,503 (17.5)          | 18                                 |
| 2                                            | 416,365 (21.9)   | 1,688,484 (19.1)          | 7                                  |
| 3                                            | 397,192 (20.9)   | 1,749,994 (19.8)          | 3                                  |
| 4                                            | 366,204 (19.2)   | 1,904,962 (21.5)          | 6                                  |
| 5 (highest)                                  | 243,440 (12.8)   | 1,930,238 (21.8)          | 24                                 |
| Rural                                        | 23,495 (1.2)     | 1,190,362 (13.4)          | 48                                 |
| <b>Comorbidities</b>                         |                  |                           |                                    |
| Diabetes in past 10 years                    | 330,686 (17.4)   | 1,331,314 (15.0)          | 7                                  |
| Myocardial Infarction in past 2 years        | 4,078 (0.2)      | 38,961 (0.4)              | 4                                  |
| Stroke in past 2 years                       | 2,620 (0.1)      | 25,083 (0.3)              | 4                                  |
| Hypertension in past 2 years                 | 341,482 (18.0)   | 1,706,317 (19.3)          | 3                                  |
| <b>Healthcare utilization in past 1 year</b> |                  |                           |                                    |
| Previous visits to nephrologist              | 17,470 (0.9)     | 96,717 (1.1)              | 2                                  |
| Previous visits to                           |                  |                           |                                    |

|                           |                  |                  |    |
|---------------------------|------------------|------------------|----|
| primary care provider     |                  |                  |    |
| 0                         | 355,545 (18.7)   | 1,901,193 (21.5) | 7  |
| 1-2                       | 467,371 (24.6)   | 2,448,268 (27.6) | 7  |
| 3-4                       | 376,625 (19.8)   | 1,702,393 (19.2) | 2  |
| 5+                        | 702,853 (36.9)   | 2,808,429 (31.7) | 11 |
| Previous hospitalizations |                  |                  |    |
| 0                         | 1,820,372 (95.7) | 8,338,519 (94.1) | 7  |
| 1                         | 70,791 (3.7)     | 413,823 (4.7)    | 5  |
| 2                         | 8,271 (0.4)      | 73,087 (0.8)     | 5  |
| 3+                        | 2,960 (0.2)      | 34,854 (0.4)     | 4  |

**Supplementary Table 4.** Characteristics of immigrants with and without end-stage kidney disease requiring maintenance dialysis (ESRD-D). All data are presented as a number (%) unless otherwise stated.

| Characteristic        | ESKD-D<br>(N = 1,700) | No ESKD-D<br>(N = 1,900,694) | Standardized<br>Difference (%) |
|-----------------------|-----------------------|------------------------------|--------------------------------|
| <b>Demographics</b>   |                       |                              |                                |
| Age, years (mean, SD) | 62.4 ± 15.3           | 44.4 ± 15.2                  | 118                            |
| 18-29                 | 44 (2.6)              | 340,227 (17.9)               | 52                             |
| 30-39                 | 100 (5.9)             | 424,186 (22.3)               | 48                             |
| 40-49                 | 199 (11.7)            | 473,336 (24.9)               | 35                             |
| 50-59                 | 374 (22.0)            | 367,870 (19.4)               | 6                              |
| 60-69                 | 380 (22.4)            | 168,798 (8.9)                | 38                             |
| 70-79                 | 362 (21.3)            | 84,565 (4.4)                 | 52                             |
| 80-89                 | 215 (12.6)            | 36,292 (1.4)                 | 42                             |
| ≥ 90                  | 26 (1.5)              | 5,420 (0.3)                  | 31                             |
| Female Sex            | 751 (44.2)            | 10,016 (52.7)                | 17                             |
| Income Quintile       |                       |                              |                                |
| First (lowest)        | 609 (35.8)            | 473,565 (24.9)               | 24                             |
| Second                | 404 (23.8)            | 415,961 (21.9)               | 5                              |
| Third                 | 322 (19.0)            | 401,889 (21.2)               | 5                              |
| Fourth                | 223 (13.1)            | 365,981 (19.3)               | 17                             |

|                                            |              |                  |    |
|--------------------------------------------|--------------|------------------|----|
| Fifth (highest)                            | 142 (8.4)    | 243,298 (12.8)   | 14 |
| Rural Residence <sup>a</sup>               | 9 (0.5)      | 23,486 (1.2)     | 8  |
| <b>Immigrant Characteristics</b>           |              |                  |    |
| <b>World Region of Origin</b>              |              |                  |    |
| East Asia, Pacific                         | 503 (29.6)   | 485,830 (25.6)   | 9  |
| Eastern Europe, Central Asia               | 71 (4.2)     | 206,813 (10.9)   | 26 |
| Latin America, Caribbean                   | 374 (22.0)   | 267,921 (14.1)   | 21 |
| Middle East, North Africa                  | 85 (5.0)     | 178,917 (9.4)    | 17 |
| South Asia                                 | 451 (26.5)   | 468,048 (24.6)   | 4  |
| Sub-Saharan Africa                         | 142 (8.4)    | 113,183 (6.0)    | 9  |
| Western Europe                             | 74 (4.4)     | 179,982 (9.5)    | 20 |
| <b>Canadian Language Ability</b>           |              |                  |    |
| English                                    | 1,037 (61.0) | 1,143,271 (60.2) | 2  |
| French                                     | 16 (0.9)     | 16,960 (0.9)     | 0  |
| Both English and French                    | 18 (1.1)     | 49,205 (2.6)     | 11 |
| Neither                                    | 629 (37.0)   | 691,258 (36.4)   | 10 |
| <b>Education</b>                           |              |                  |    |
| None                                       | 132 (7.8)    | 162,424 (8.5)    | 3  |
| Secondary or less                          | 985 (57.9)   | 886,980 (46.7)   | 23 |
| Formal trade cert. or apprenticeship       | 128 (7.5)    | 117,382 (6.2)    | 5  |
| Non-university cert. or diploma            | 99 (5.8)     | 141,787 (7.5)    | 7  |
| Some university, no degree                 | 85 (5.0)     | 76,652 (4.0)     | 5  |
| Bachelor's degree                          | 207 (12.2)   | 369,634 (19.4)   | 20 |
| Some post-grad, no degree                  | 6 (0.4)      | 17,470 (0.9)     | 6  |
| Master's degree                            | 48 (2.8)     | 110,798 (5.8)    | 15 |
| Doctorate                                  | 10 (0.6)     | 17,494 (0.9)     | 3  |
| Unknown/missing                            | 0 (0.0)      | 73 (0.0)         | 3  |
| <b>Skill Level</b>                         |              |                  |    |
| Skill level 0-Managerial                   | 36 (2.1)     | 41,127 (2.2)     | 1  |
| Skill level A-Professional                 | 74 (4.4)     | 213,550 (11.2)   | 26 |
| Skill level B-Skilled and Technical        | 170 (10.0)   | 165,087 (8.7)    | 4  |
| Skill level C-Intermediate and Clerical    | 167 (9.8)    | 97,269 (5.1)     | 18 |
| Skill level D-Elemental and Laborers       | 49 (2.9)     | 24,939 (1.3)     | 11 |
| Children ( $\leq 15$ years of age)         | 49 (2.9)     | 296,229 (15.6)   | 45 |
| New Workers ( $\geq 15$ years of age)      | 539 (31.7)   | 525,675 (27.7)   | 9  |
| Industrial Codes ( $\geq 15$ years of age) | 20 (1.2)     | 7,467 (0.4)      | 9  |
| Students ( $\geq 15$ years of age)         | 63 (3.7)     | 199,382 (10.5)   | 27 |

|                                                     |                |                  |     |
|-----------------------------------------------------|----------------|------------------|-----|
| Retirees ( $\geq 15$ years of age)                  | 201 (11.8)     | 60,572 (3.2)     | 33  |
| Other Non-workers ( $\geq 15$ years of age)         | 332 (19.5)     | 268,814 (14.1)   | 14  |
| Unknown/missing                                     | 0 (0.0)        | 583 (0.0)        | 3   |
| <b>Marital Status</b>                               |                |                  |     |
| Single                                              | 366 (21.5)     | 782,580 (41.2)   | 43  |
| Married or Common-law                               | 1,150 (67.6)   | 10,445 (55.0)    | 26  |
| Separated, Divorced, Widowed                        | 184 (10.8)     | 73,241 (3.9)     | 27  |
| Unknown/Missing                                     | 0 (0.0)        | 292 (0.0)        | 14  |
| <b>Time since Immigration, years (mean, SD)</b>     |                |                  |     |
| 0-4                                                 | 98 (5.8)       | 260,064 (13.7)   | 27  |
| 5-9                                                 | 203 (11.9)     | 385,080 (20.3)   | 23  |
| 10-14                                               | 252 (14.8)     | 400,727 (21.1)   | 16  |
| 15-19                                               | 342 (20.1)     | 341,510 (18.0)   | 5   |
| $\geq 20$                                           | 805 (47.4)     | 513,313 (27.0)   | 43  |
| Refugee Status                                      | 321 (18.9)     | 309,964 (16.3)   | 7   |
| <b>Comorbidities</b>                                |                |                  |     |
| Diabetes (in past 10 years)                         | 1,111 (65.4)   | 329,575 (17.3)   | 112 |
| Myocardial Infarction (in past 2 years)             | 123 (7.2)      | 3,955 (0.2)      | 38  |
| Stroke (in past 2 years)                            | 38 (2.2)       | 2,582 (0.1)      | 20  |
| Hypertension (in past 2 years)                      | 1,157 (68.1)   | 340,325 (17.9)   | 118 |
| <b>Healthcare Utilization (in past 1 year)</b>      |                |                  |     |
| $\geq 1$ Previous Visits to Nephrologist            | 1400 (82.4)    | 16,070 (0.8)     | 295 |
| Previous Visits to Primary Care Provider (mean, SD) | 8.2 $\pm$ 13.1 | 4.5 $\pm$ 5.2    | 38  |
| 0                                                   | 278 (16.4)     | 355,267 (18.7)   | 6   |
| 1-2                                                 | 344 (20.2)     | 467,027 (24.6)   | 11  |
| 3-4                                                 | 266 (15.6)     | 376,359 (19.8)   | 11  |
| 5+                                                  | 812 (47.8)     | 702,041 (36.9)   | 22  |
| <b>Previous Hospitalizations (mean, SD)</b>         |                |                  |     |
| 0                                                   | 944 (55.5)     | 1,819,428 (95.7) | 106 |
| 1                                                   | 402 (23.6)     | 70,389 (3.7)     | 61  |
| 2                                                   | 164 (9.6)      | 8,107 (0.4)      | 43  |
| 3+                                                  | 190 (11.2)     | 2,770 (0.1)      | 50  |

<sup>a</sup> Refers to location of residence with a population size < 10,000 persons.

Abbreviations: SD, standard deviation.

**Supplementary Table 5:** Age-adjusted prevalence ratios of end-stage kidney disease requiring maintenance dialysis, by region of immigration stratified by income quintile at dialysis initiation.

| Income quintile | Immigrant World Region                       | Age-adjusted PR | L 95% CI | U 95% CI | Interaction p-value |
|-----------------|----------------------------------------------|-----------------|----------|----------|---------------------|
| 1 (lowest)      | East Asia & Pacific                          | 1.17            | 0.99     | 1.39     | 0.32                |
|                 | Eastern Europe & Central Asia                | 0.55            | 0.33     | 0.91     |                     |
|                 | Latin America & Caribbean                    | 2.32            | 1.97     | 2.73     |                     |
|                 | Middle East & North Africa                   | 0.58            | 0.36     | 0.93     |                     |
|                 | South Asia                                   | 1.12            | 0.94     | 1.34     |                     |
|                 | Sub-Saharan Africa                           | 2.59            | 2.04     | 3.30     |                     |
|                 | Western Europe, USA, Australia & New Zealand | 0.55            | 0.33     | 0.91     |                     |
|                 | Resident                                     | 1.00            | REF      | REF      |                     |
| 2               | East Asia & Pacific                          | 1.16            | 0.96     | 1.40     |                     |
|                 | Eastern Europe & Central Asia                | 0.62            | 0.34     | 1.12     |                     |
|                 | Latin America & Caribbean                    | 2.07            | 1.65     | 2.59     |                     |
|                 | Middle East & North Africa                   | 0.89            | 0.53     | 1.48     |                     |
|                 | South Asia                                   | 1.28            | 1.06     | 1.55     |                     |
|                 | Sub-Saharan Africa                           | 1.58            | 0.93     | 2.68     |                     |
|                 | Western Europe, USA, Australia & New Zealand | 0.62            | 0.36     | 1.07     |                     |
|                 | Resident                                     | 1.00            | REF      | REF      |                     |
| 3               | East Asia & Pacific                          | 1.44            | 1.18     | 1.77     |                     |
|                 | Eastern Europe & Central Asia                | 0.55            | 0.28     | 1.05     |                     |
|                 | Latin America & Caribbean                    | 1.75            | 1.31     | 2.33     |                     |
|                 | Middle East & North Africa                   | 0.71            | 0.40     | 1.24     |                     |
|                 | South Asia                                   | 1.44            | 1.18     | 1.75     |                     |
|                 | Sub-Saharan Africa                           | 2.46            | 1.42     | 4.24     |                     |
|                 | Western Europe, USA, Australia & New Zealand | 0.63            | 0.35     | 1.15     |                     |
|                 | Resident                                     | 1.00            | REF      | REF      |                     |
| 4               | East Asia & Pacific                          | 1.21            | 0.95     | 1.54     |                     |
|                 | Eastern Europe & Central Asia                | 0.46            | 0.23     | 0.93     |                     |
|                 | Latin America & Caribbean                    | 1.84            | 1.28     | 2.66     |                     |
|                 | Middle East & North Africa                   | 1.04            | 0.65     | 1.65     |                     |
|                 | South Asia                                   | 1.35            | 1.05     | 1.74     |                     |
|                 | Sub-Saharan Africa                           | 2.57            | 1.34     | 4.95     |                     |
|                 | Western Europe, USA, Australia & New Zealand | 0.81            | 0.48     | 1.37     |                     |
|                 | Resident                                     | 1.00            | REF      | REF      |                     |
| 5 (highest)     | East Asia & Pacific                          | 1.50            | 1.12     | 2.00     |                     |
|                 | Eastern Europe & Central Asia                | 0.51            | 0.21     | 1.23     |                     |
|                 | Latin America & Caribbean                    | 2.31            | 1.39     | 3.84     |                     |
|                 | Middle East & North Africa                   | 0.75            | 0.37     | 1.50     |                     |
|                 | South Asia                                   | 2.24            | 1.64     | 3.06     |                     |

|                                              |      |      |      |
|----------------------------------------------|------|------|------|
| Sub-Saharan Africa                           | 2.12 | 0.68 | 6.57 |
| Western Europe, USA, Australia & New Zealand | 0.29 | 0.11 | 0.77 |
| Resident                                     | 1.00 | REF  | REF  |

Supplementary Table 6: Censoring events among incident patients by world region

| Immigrant World Region                       | Death               | %     | Preemptive-Transplant | %     |
|----------------------------------------------|---------------------|-------|-----------------------|-------|
|                                              | East Asia & Pacific | 10117 | 2.11%                 | 75    |
| Eastern Europe & Central Asia                | 4476                | 2.64% | 22                    | 0.01% |
| Latin America & Caribbean                    | 3920                | 2.06% | 31                    | 0.02% |
| Middle East & North Africa                   | 2247                | 1.41% | 19                    | 0.01% |
| South Asia                                   | 8552                | 1.89% | 101                   | 0.02% |
| Western Europe, USA, Australia & New Zealand | 5440                | 3.99% | 30                    | 0.02% |
| Sub-Saharan Africa                           | 1723                | 1.72% | 27                    | 0.03% |

Supplementary Table 7: Age-adjusted hazard ratios of incidence of end-stage kidney disease requiring maintenance dialysis, by region of immigration stratified by gender and diabetes

#### FEMALES

| Immigrant World Region                       | HR   | L 95% CI | U 95% CI | p-value |
|----------------------------------------------|------|----------|----------|---------|
| East Asia & Pacific                          | 1.70 | 1.29     | 2.25     | 0.0002  |
| Eastern Europe & Central Asia                | 0.88 | 0.61     | 1.28     | 0.51    |
| Latin America & Caribbean                    | 3.11 | 2.33     | 4.17     | <0.0001 |
| Middle East & North Africa                   | 1.20 | 0.82     | 1.77     | 0.34    |
| South Asia                                   | 2.25 | 1.69     | 2.98     | <0.0001 |
| Western Europe, USA, Australia & New Zealand | 1.00 | REF      | REF      | REF     |
| Sub-Saharan Africa                           | 3.84 | 2.78     | 5.31     | <0.0001 |
| Other                                        |      |          |          |         |

#### MALES

| Immigrant World Region | HR   | L 95% CI | U 95% CI | p-value |
|------------------------|------|----------|----------|---------|
| East Asia & Pacific    | 1.24 | 0.97     | 1.58     | 0.08    |





|                                              |    |       |    |       |     |       |     |       |
|----------------------------------------------|----|-------|----|-------|-----|-------|-----|-------|
| East Asia & Pacific                          | 87 | 12.4% | 87 | 12.4% | 111 | 15.8% | 416 | 59.3% |
| Eastern Europe & Central Asia                | 22 | 17.5% | 16 | 12.7% | 19  | 15.1% | 69  | 54.8% |
| Latin America & Caribbean                    | 50 | 11.1% | 65 | 14.4% | 58  | 12.9% | 278 | 61.6% |
| Middle East & North Africa                   | 12 | 9.2%  | 21 | 16.2% | 22  | 16.9% | 75  | 57.7% |
| South Asia                                   | 75 | 10.1% | 81 | 10.9% | 113 | 15.2% | 474 | 63.8% |
| Western Europe, USA, Australia & New Zealand | 16 | 11.5% | 22 | 15.8% | 25  | 18.0% | 76  | 54.7% |
| Sub-Saharan Africa                           | 20 | 9.1%  | 35 | 16.0% | 30  | 13.7% | 134 | 61.2% |

| Immigrant World Region                       | Nephrology Visits 365 days prior to ESKD-D |      |             |      |          |      |           |       |
|----------------------------------------------|--------------------------------------------|------|-------------|------|----------|------|-----------|-------|
|                                              | 0 visits                                   |      | 1 visit     |      | 2 visits |      | 3+ visits |       |
|                                              | N                                          | %    | N           | %    | N        | %    | N         | %     |
| East Asia & Pacific                          | 0                                          | 0.0% | 24          | 3.9% | 28       | 4.6% | 562       | 91.5% |
| Eastern Europe & Central Asia                | 0                                          | 0.0% | 10          | 9.6% | 7        | 6.7% | 87        | 83.7% |
| Latin America & Caribbean                    | 0                                          | 0.0% | 21          | 5.2% | 15       | 3.7% | 365       | 91.0% |
| Middle East & North Africa                   | 0                                          | 0.0% | small cells |      |          |      | 104       | 88.1% |
| South Asia                                   | 0                                          | 0.0% | 25          | 3.7% | 29       | 4.3% | 614       | 91.9% |
| Western Europe, USA, Australia & New Zealand | 0                                          | 0.0% | small cells |      |          |      | 114       | 92.7% |
| Sub-Saharan Africa                           | 0                                          | 0.0% | 18          | 9.0% | 11       | 5.5% | 170       | 85.4% |

Abbreviation: ESKD-D, end stage kidney disease requiring maintenance dialysis
