# Supplementary material
Source: PubMed Central journal article supplement (PMC6050933)
Supplement: ASN.2017101055SupplementaryData2.pdf [file ASN.2017101055SupplementaryData2.pdf]

## **SIGNIFICANCE STATEMENT**

This study examined the risk of ESRD requiring maintenance dialysis (ESRD-D) among immigrants to Ontario, Canada. Health care and dialysis are universally available to residents of Ontario. Rates of ESRD-D were higher among immigrants from sub-Saharan Africa, the Caribbean, South Asia, and East Asia/Pacific regions. Countries specifically at the highest risk of ESRD-D included Somalia, Trinidad and Tobago, Guyana, Jamaica, and the Philippines. Immigrants residing in Ontario for >10 years had higher rates of ESRD-D than age-matched immigrants with a shorter duration of residence. This study provides important insight into those predisposed to advanced kidney disease, and supports the need for targeted screening and preventive measures among identified high-risk groups.
